# Supplementary material for: Rapid cessation of acute diarrhea using a novel solution of bioactive polyphenols: a randomized trial in Nicaraguan children
Source: PeerJ. 2015 May 21;3:e969. doi: 10.7717/peerj.969 (PMC4451028; doi:10.7717/peerj.969)
Supplement: Supplemental Information 1 — Data from randomized study of resolution of acute diarrhea in children randomized to receive ORS+placebo or ORS+polyphenol supplement. [file peerj-03-969-s001.xlsx]

## Sheet: Sheet1
Given LifeDrops on Day 1 and Placebo on Day 2																																														Before consumption on Day 1			30 mins after on Day 1
													Stool 1			Stool 2			Stool 3			Stool 4			Stool 5			Stool 6			Stool 7			Stool 8			Stool 9			Stool 10			Stool 11
Subject #	Age (Yrs)	Weight (Kg)	Sex (M/F)	Date of Informed Consent	Date of Screening Visit	Screen Failure Y/N	Parasitology Lab Result N/P	Date of Visit 1	Time of Dose 1	Date of Visit 2	Time of Dose 2	Date of Visit 3	Date	Time	BSS ranking	Date	Time	BSS ranking	Date	Time	BSS ranking	Date	Time	BSS ranking	Date	Time	BSS ranking	Date	Time	BSS ranking	Date	Time	BSS ranking	Date	Time	BSS ranking	Date	Time	BSS ranking	Date	Time	Consistency	Date	Time	BSS ranking	Stomach discomfort	Gas/ bloating	Urgency of defecation	Stomach discomfort
114	4	16	M	2010-09-16	2010-09-16	N	N	2010-09-16	1904-01-01 09:00:00	2010-09-17	1904-01-01 10:00:00	2010-09-18	2010-09-16	1904-01-01 10:18:00	3	2010-09-16	1904-01-01 18:36:00	2	2010-09-17	1904-01-01 05:40:00	2	2010-09-17	1904-01-01 12:40:00	1	2010-09-17	1904-01-01 20:05:00	1	2010-09-19	1904-01-01 07:37:00	1
119	3	19	F	2010-09-17	2010-09-17	N	N	2010-09-17	1904-01-01 15:00:00	2010-09-18	1904-01-01 07:00:00	2010-09-19	2010-09-17	1904-01-01 17:40:00	4	2010-09-17	1904-01-01 21:10:00	3	2010-09-18	1904-01-01 06:00:00	3	2010-09-18	1904-01-01 09:08:00	2	2010-09-18	1904-01-01 15:30:00	2	2010-09-19	1904-01-01 07:20:00	2	2010-09-19	1904-01-01 14:08:00	2
121	7	30	F	2010-09-17	2010-09-17	N	N	2010-09-17	1904-01-01 09:00:00	2010-09-18	1904-01-01 09:00:00	2010-09-19	2010-09-17	1904-01-01 15:00:00	2	2010-09-17	1904-01-01 18:30:00	2
125	5	26	F	2010-09-17	2010-09-17	N	N	2010-09-17	1904-01-01 10:00:00	2010-09-18	1904-01-01 09:00:00	2010-09-19	2010-09-17	1904-01-01 11:00:00	5	2010-09-17	1904-01-01 14:00:00	4	2010-09-17	1904-01-01 19:00:00	4	2010-09-17	1904-01-01 23:00:00	3	2010-09-18	1904-01-01 05:00:00	3	2010-09-18	1904-01-01 11:00:00	3	2010-09-18	1904-01-01 15:30:00	2	2010-09-18	1904-01-01 20:05:00	2
126	2	21	M	2010-09-17	2010-09-17	N	N	2010-09-17	1904-01-01 08:00:00	2010-09-18	1904-01-01 08:30:00	2010-09-19	2010-09-17	1904-01-01 12:30:00	6	2010-09-17	1904-01-01 19:30:00	5	2010-09-18	1904-01-01 06:00:00	4	2010-09-18	1904-01-01 16:00:00	4
130	2	12	F	2010-09-17	2010-09-17	N	N	2010-09-17	1904-01-01 11:00:00	2010-09-18	1904-01-01 07:00:00	2010-09-19	2010-09-17	1904-01-01 15:30:00	4	2010-09-18	1904-01-01 06:00:00	4
132	10	43	M	2010-09-17	2010-09-17	N	N	2010-09-17	1904-01-01 08:00:00	2010-09-18	1904-01-01 07:00:00	2010-09-19	2010-09-17	1904-01-01 10:35:00	6	2010-09-17 17:00:00	1904-01-01 17:00:00	5	2010-09-17	1904-01-01 23:20:00	5	2010-09-18	1904-01-01 02:40:00	4	2010-09-18	1904-01-01 06:30:00	4	2010-09-18	1904-01-01 14:30:00	2
135	2	13	M	2010-09-17	2010-09-17	N	N	2010-09-17	1904-01-01 13:30:00	2010-09-18	1904-01-01 13:30:00	2010-09-19	2010-09-17	1904-01-01 13:43:00	5	2010-09-17	1904-01-01 15:05:00	4	2010-09-17	1904-01-01 18:00:00	4	2010-09-17	1904-01-01 23:00:00	3	2010-09-18	1904-01-01 09:00:00	3	2010-09-18	1904-01-01 15:40:00	2
141	8	30	F	2010-09-20	2010-09-20	N	N	2010-09-20	1904-01-01 08:00:00	2010-09-21	1904-01-01 15:00:00	2010-09-22	2010-09-20	1904-01-01 14:30:00	3	2010-09-20	1904-01-01 17:00:00	2
143	3	14	M	2010-09-20	2010-09-20	N	N	2010-09-20	1904-01-01 09:00:00	2010-09-21	1904-01-01 10:00:00	2010-09-22	2010-09-20	1904-01-01 10:10:00	4	2010-09-20	1904-01-01 17:00:00	2
146	4	14	F	2010-09-20	2010-09-20	N	N	2010-09-20	1904-01-01 09:00:00	2010-09-21	1904-01-01 09:00:00	2010-09-22	2010-09-20	1904-01-01 14:00:00	3
147	3	36	F	2010-09-20	2010-09-20	N	N	2010-09-20	1904-01-01 10:00:00	2010-09-21	1904-01-01 10:00:00	2010-09-22	2010-09-20	1904-01-01 10:00:00	4	2010-09-20	1904-01-01 15:30:00	2
153	5	20	F	2010-09-20	2010-09-20	N	N	2010-09-20	1904-01-01 14:40:00	2010-09-21	1904-01-01 14:40:00	2010-09-22	2010-09-20	1904-01-01 20:12:00	2	2010-09-21	1904-01-01 11:00:00	2
157	2	10	M	2010-09-20	2010-09-20	N	N	2010-09-20	1904-01-01 15:20:00	2010-09-21	1904-01-01 08:00:00	2010-09-22	2010-09-20	16:10:00	3
162	11	34	M	2010-09-21	2010-09-21	N	N	2010-09-21	1904-01-01 08:10:00	2010-09-22	1904-01-01 10:00:00	2010-09-23	2010-09-21	1904-01-01 10:50:00	6	2010-09-21	1904-01-01 17:30:00	4	2010-09-22	1904-01-01 09:30:00	2
166	6	24	M	2010-09-21	2010-09-21	N	N	2010-09-21	1904-01-01 09:00:00	2010-09-22	1904-01-01 13:00:00	2010-09-23	2010-09-21	1904-01-01 17:00:00	1	2010-09-22	1904-01-01 06:00:00	1	2010-09-22	1904-01-01 19:00:00	1
170	4	19	F	2010-09-21	2010-09-21	N	N	2010-09-21	1904-01-01 10:15:00	2010-09-22	1904-01-01 07:00:00	2010-09-23	2010-09-21	1904-01-01 12:20:00	4	2010-09-21	1904-01-01 18:10:00	2
187	8	27	M	2010-09-23	2010-09-23	N	N	2010-09-23	1904-01-01 08:00:00	2010-09-24	1904-01-01 15:00:00	2010-09-25	2010-09-23	1904-01-01 14:00:00	7	2010-09-23	1904-01-01 18:12:00	7	2010-09-23	1904-01-01 21:25:00	6	2010-09-24	1904-01-01 04:30:00	5	2010-09-24	1904-01-01 09:00:00	4	2010-09-24	1904-01-01 11:30:00	3	2010-09-24	1904-01-01 16:20:00	3	2010-09-24	1904-01-01 20:20:00	3
197	5	20	M	2010-09-27	2010-09-27	N	N	2010-09-27	1904-01-01 07:15:00	2010-09-28	1904-01-01 15:00:00	2010-09-29	2010-09-27	1904-01-01 13:15:00	4	2010-09-27	1904-01-01 19:13:00	3	2010-09-28	1904-01-01 06:30:00	3
200	2	11	F	2010-09-27	2010-09-27	N	N	2010-09-27	1904-01-01 16:00:00	2010-09-28	1904-01-01 08:00:00	2010-09-29	2010-09-27	1904-01-01 16:12:00	4	2010-09-27	1904-01-01 17:20:00	2	2010-09-28	1904-01-01 08:00:00	2	2010-09-28	1904-01-01 19:00:00	4
323	9	29	F	2010-11-26	2010-11-26	N	N	2010-11-26	1904-01-01 09:45:00	2010-11-27	1904-01-01 09:40:00	2010-11-28	2010-11-26	1904-01-01 13:00:00	7	2010-11-26	1904-01-01 18:20:00	4	2010-11-27	1904-01-01 00:43:00	4	2010-11-27	1904-01-01 07:50:00	4	2010-11-27	1904-01-01 13:36:00	4	2010-11-27	1904-01-01 22:11:00	3	2010-11-28	1904-01-01 07:00:00	3													2	1	7	2
327	17	76	F	2010-11-26	2010-11-26	N	N	2010-11-26	1904-01-01 14:30:00	2010-11-27	1904-01-01 14:30:00	2010-11-28	2010-11-26	1904-01-01 15:30:00	7	2010-11-26	1904-01-01 20:15:00	5	2010-11-27	1904-01-01 05:20:00	5	2010-11-27	1904-01-01 09:36:00	5	2010-11-27	1904-01-01 13:20:00	4	2010-11-27	1904-01-01 18:43:00	4	2010-11-27	1904-01-01 23:10:00	4	2010-11-28	1904-01-01 08:12:00	4	2010-11-28	1904-01-01 12:53:00	4							2	1	6	2
329	16	72	F	2010-11-26	2010-11-26	N	N	2010-11-26	1904-01-01 15:10:00	2010-11-27	1904-01-01 15:00:00	2010-11-28	2010-11-26	1904-01-01 18:30:00	5	2010-11-27	1904-01-01 05:23:00	4	2010-11-27	1904-01-01 09:40:00	4	2010-11-27	1904-01-01 13:37:00	4	2010-11-27	1904-01-01 21:20:00	3	2010-11-28	1904-01-01 07:25:00	3	2010-11-28	1904-01-01 12:27:00	3													2	2	6	2
333	17	70	F	2010-11-26	2010-11-26	N	N	2010-11-26	1904-01-01 17:00:00	2010-11-27	1904-01-01 17:00:00	2010-11-28	2010-11-26	1904-01-01 19:30:00	3	2010-11-27	1904-01-01 02:15:00	3	2010-11-27	1904-01-01 09:40:00	3	2010-11-27	1904-01-01 14:43:00	2	2010-11-27	1904-01-01 22:17:00	2	2010-11-28	1904-01-01 09:11:00	2	2010-11-28	1904-01-01 13:32:00	2													2	1	6	2
334	6	20	F	2010-11-27	2010-11-27	N	N	2010-11-27	1904-01-01 06:30:00	2010-11-28	1904-01-01 06:30:00	2010-11-29	2010-11-27	1904-01-01 08:50:00	5	2010-11-27	1904-01-01 12:17:00	5	2010-11-27	1904-01-01 17:23:00	4	2010-11-27	1904-01-01 21:10:00	4	2010-11-28	1904-01-01 05:20:00	4	2010-11-28	1904-01-01 10:39:00	3	2010-11-28	1904-01-01 14:50:00	3	2010-11-29	1904-01-01 05:05:00	3										3	2	6	2
336	17	50	F	2010-11-27	2010-11-27	N	N	2010-11-27	1904-01-01 08:00:00	2010-11-28	1904-01-01 08:00:00	2010-11-29	2010-11-27	1904-01-01 12:36:00	4	2010-11-27	1904-01-01 19:42:00	4	2010-11-28	1904-01-01 06:12:00	3	2010-11-28	1904-01-01 11:50:00	3	2010-11-28	1904-01-01 22:12:00	3	2010-11-29	1904-01-01 06:39:00	3																2	2	6	2
372	15	62	M	2010-12-02	2010-12-02	N	N	2010-12-02	1904-01-01 08:10:00	2010-12-03	1904-01-01 08:10:00	2010-12-04	2010-12-02	1904-01-01 12:15:00	3	2010-12-02	1904-01-01 20:27:00	3	2010-12-03	1904-01-01 06:12:00	3	2010-12-03	1904-01-01 13:00:00	2	2010-12-04	1904-01-01 06:45:00	2																			3	1	6	3
378	16	60	F	2010-12-02	2010-12-02	N	N	2010-12-02	1904-01-01 12:30:00	2010-12-03	1904-01-01 12:30:00	2010-12-04	2010-12-02	22:39	3	2010-12-03	1904-01-01 03:12:00	3	2010-12-03	1904-01-01 08:28:00	3	2010-12-03	1904-01-01 11:10:00	3	2010-12-04	1904-01-01 09:23:00	3																			2	1	6	2
391	15	45	M	2010-12-04	2010-12-04	N	N	2010-12-04	1904-01-01 10:10:00	2010-12-05	1904-01-01 10:10:00	2010-12-06	2010-12-04	1904-01-01 14:30:00	3	2010-12-04	1904-01-01 19:18:00	3	2010-12-05	1904-01-01 09:00:00	2	2010-12-05	1904-01-01 13:05:00	2	2010-12-06	1904-01-01 07:26:00	2																			2	2	6	2
393	10	38	M	2010-12-04	2010-12-04	N	N	2010-12-04	1904-01-01 11:15:00	2010-12-05	1904-01-01 11:15:00	2010-12-06	2010-12-04	1904-01-01 15:40:00	3	2010-12-04	1904-01-01 23:50:00	3	2010-12-05	1904-01-01 07:45:00	3	2010-12-05	1904-01-01 17:20:00	2	2010-12-06	1904-01-01 02:18:00	2	2020-12-06	1904-01-01 10:00:00	2																2	2	6	2
Given Placebo on Day 1 and LifeDrops on Day 2																																														Before consumption on Day 1			30 mins after on Day 1
													Stool 1			Stool 2			Stool 3			Stool 4			Stool 5			Stool 6			Stool 7			Stool 8			Stool 9			Stool 10			Stool 11
Subject #	Age (Yrs)	Weight (Kg)	Sex (M/F)	Date of Informed Consent	Date of Screening Visit	Screen Failure Y/N	Parasitology Lab Result N/P	Date of Visit 1	Time of Dose 1	Date of Visit 2	Time of Dose 2	Date of Visit 3	Date	Time	BSS ranking	Date	Time	BSS ranking	Date	Time	BSS ranking	Date	Time	BSS ranking	Date	Time	BSS ranking	Date	Time	BSS ranking	Date	Time	BSS ranking	Date	Time	BSS ranking	Date	Time	BSS ranking	Date	Time	Consistency	Date	Time	BSS ranking	Stomach discomfort	Gas/ bloating	Urgency of defecation	Stomach discomfort
124	3	28	M	2010-09-17	2010-09-17	N	N	2010-09-17	1904-01-01 08:00:00	2010-09-18	1904-01-01 09:00:00	2010-09-19	2010-09-17	1904-01-01 10:15:00	6	2010-09-17	1904-01-01 11:50:00	6	2010-09-17	1904-01-01 15:00:00	5	2010-09-17	1904-01-01 19:46:00	5	2010-09-18	1904-01-01 06:10:00	5	2010-09-18	1904-01-01 14:30:00	3	2010-09-18	1904-01-01 18:33:00	2
127	2	14	F	2010-09-17	2010-09-17	N	N	2010-09-17	1904-01-01 08:00:00	2010-09-18	1904-01-01 08:00:00	2010-09-19	2010-09-17	1904-01-01 09:15:00	7	2010-09-17	1904-01-01 11:30:00	7	2010-09-17	1904-01-01 15:00:00	6	2010-09-17	1904-01-01 19:00:00	6	2010-09-18	1904-01-01 05:00:00	5	2010-09-18	1904-01-01 09:00:00	5	2010-09-18	1904-01-01 17:00:00	4
131	2	9	M	2010-09-17	2010-09-17	N	N	2010-09-17	1904-01-01 12:42:00	2010-09-18	1904-01-01 13:00:00	2010-09-19	2010-09-17	1904-01-01 13:32:00	5	2010-09-17	1904-01-01 19:30:00	4	2010-09-18	1904-01-01 09:47:00	4	2010-09-18	1904-01-01 14:00:00	3
133	2	14	F	2010-09-17	2010-09-17	N	N	2010-09-17	1904-01-01 14:00:00	2010-09-18	1904-01-01 09:00:00	2010-09-19	2010-09-17	1904-01-01 16:50:00	5	2010-09-17	1904-01-01 19:30:00	5	2010-09-18	1904-01-01 01:10:00	4	2010-09-18	1904-01-01 03:50:00	4	2010-09-18	1904-01-01 20:23:00	3	2010-09-19	1904-01-01 07:11:00	2	2010-09-19	1904-01-01 13:20:00	2
134	2	13	M	2010-09-17	2010-09-17	N	N	2010-09-17	1904-01-01 07:00:00	2010-09-18	1904-01-01 08:00:00	2010-09-19	2010-09-17	1904-01-01 15:30:00	5	2010-09-17	1904-01-01 18:50:00	5	2010-09-17	1904-01-01 15:37:00	5	2010-09-17	1904-01-01 18:50:00	5	2010-09-18	1904-01-01 02:00:00	4	2010-09-18	1904-01-01 07:15:00	4	2010-09-18	1904-01-01 12:20:00	4	2010-09-18	1904-01-01 14:40:00	3	2010-09-18	1904-01-01 18:05:00	2
136	9	31	M	2010-09-17	2010-09-17	N	N	2010-09-17	1904-01-01 14:00:00	2010-09-18	1904-01-01 14:00:00	2010-09-19	2010-09-17	1904-01-01 17:30:00	5	2010-09-17	1904-01-01 22:00:00	4
140	17	76	M	2010-09-20	2010-09-20	N	N	2010-09-20	1904-01-01 08:10:00	2010-09-21	1904-01-01 08:10:00	2010-09-22	2010-09-20	1904-01-01 08:22:00	3	2010-09-20	1904-01-01 13:00:00	2	2010-09-21	1904-01-01 18:00:00	1
142	2	9	M	2010-09-20	2010-09-20	N	N	2010-09-20	1904-01-01 08:00:00	2010-09-21	1904-01-01 08:00:00	2010-09-22	2010-09-20	1904-01-01 08:17:00	6	2010-09-20	1904-01-01 09:51:00	6	2010-09-20	1904-01-01 13:43:00	5	2010-09-20	1904-01-01 16:10:00	5	2010-09-21	1904-01-01 02:00:00	5	2010-09-21	1904-01-01 06:11:00	5	2010-09-21	1904-01-01 09:30:00	4	2010-09-21	1904-01-01 10:07:00	4	2010-09-21	1904-01-01 15:30:00	2
144	6	24	F	2010-09-20	2010-09-20	N	N	2010-09-20	1904-01-01 09:00:00	2010-09-21	1904-01-01 13:00:00	2010-09-22	2010-09-20	1904-01-01 11:30:00	4	2010-09-20	1904-01-01 16:20:00	4	2010-09-20	1904-01-01 21:15:00	3	2010-09-21	1904-01-01 06:20:00	2	2010-09-21	1904-01-01 11:30:00	4 days, 0:00:00
145	2	11	F	2010-09-20	2010-09-20	N	N	2010-09-20	1904-01-01 09:00:00	2010-09-21	1904-01-01 09:00:00	2010-09-22	2010-09-20	1904-01-01 11:00:00	6	2010-09-20	1904-01-01 14:00:00	6	2010-09-20	1904-01-01 18:00:00	5	2010-09-20	1904-01-01 23:00:00	5	2010-09-21	1904-01-01 06:00:00	5	2010-09-21	1904-01-01 10:00:00	4	2010-09-21	1904-01-01 15:00:00	4	2010-09-21	1904-01-01 21:00:00	3
151	4	14	M	2010-09-20	2010-09-20	N	N	2010-09-20	1904-01-01 14:20:00	2010-09-21	1904-01-01 14:20:00	2010-09-22	2010-09-20	1904-01-01 14:50:00	6	2010-09-20	1904-01-01 16:20:00	6	2010-09-20	1904-01-01 20:00:00	5	2010-09-21	1904-01-01 05:00:00	5	2010-09-21	1904-01-01 13:00:00	5	2010-09-21	1904-01-01 16:30:00	3
152	4	17	M	2010-09-20	2010-09-20	N	N	2010-09-20	1904-01-01 14:25:00	2010-09-21	1904-01-01 14:25:00	2010-09-22	2010-09-20	1904-01-01 16:40:00	4	2010-09-21	1904-01-01 07:00:00	2
156	2	13	F	2010-09-20	2010-09-20	N	N	2010-09-20	1904-01-01 15:00:00	2010-09-21	1904-01-01 15:00:00	2010-09-22	2010-09-20	1904-01-01 19:30:00	3	2010-09-21	1904-01-01 03:10:00	3	2010-09-21		2
163	5	31	F	2010-09-21	2010-09-21	N	N	2010-09-21	1904-01-01 08:20:00	2010-09-22	1904-01-01 09:00:00	2010-09-23	2010-09-21	1904-01-01 10:05:00	3	2010-09-21	1904-01-01 12:30:00	3	2010-09-21	1904-01-01 15:40:00	3	2010-09-21	1904-01-01 20:20:00	3	2010-09-22	1904-01-01 15:00:00	1
168	9	30	M	2010-09-21	2010-09-21	N	N	2010-09-21	1904-01-01 10:00:00	2010-09-22	1904-01-01 07:00:00	2010-09-23	2010-09-21	1904-01-01 10:50:00	4	2010-09-21	1904-01-01 13:00:00	4	2010-09-21	1904-01-01 16:00:00	3	2010-09-21	1904-01-01 19:15:00	3	2010-09-21	1904-01-01 23:00:00	3	2010-09-22	1904-01-01 11:10:00	2
179	7	33	F	2010-09-23	2010-09-23	N	N	2010-09-23	1904-01-01 07:00:00	2010-09-24	1904-01-01 07:00:00	2010-09-25	2010-09-23	1904-01-01 10:10:00	5	2010-09-23	1904-01-01 14:30:00	5	2010-09-23	1904-01-01 18:15:00	5	2010-09-23	1904-01-01 23:20:00	5	2010-09-24	1904-01-01 04:10:00	4	2010-09-24	1904-01-01 08:30:00	4	2010-09-24	1904-01-01 13:00:00	4	2010-09-24	1904-01-01 19:10:00	2	2010-09-25	1904-01-01 00:50:00	1
180	5	20	F	2010-09-23	2010-09-23	N	N	2010-09-23	1904-01-01 07:05:00	2010-09-24	1904-01-01 16:00:00	2010-09-25	2010-09-23	1904-01-01 12:50:00	5	2010-09-23	1904-01-01 18:30:00	5	2010-09-24	1904-01-01 05:10:00	4	2010-09-24	1904-01-01 11:10:00	3	2010-09-24	1904-01-01 19:30:00	2
188	10	19	M	2010-09-23	2010-09-23	N	N	2010-09-23	1904-01-01 10:20:00	2010-09-24	1904-01-01 14:00:00	2010-09-25	2010-09-23	1904-01-01 13:30:00	7	2010-09-23	1904-01-01 17:20:00	7	2010-09-23	1904-01-01 21:32:00	7	2010-09-24	1904-01-01 05:17:00	6	2010-09-24	1904-01-01 10:00:00	6	2010-09-24	1904-01-01 12:30:00	6	2010-09-24	1904-01-01 17:20:00	4	2010-09-24	1904-01-01 21:32:00	4	2010-09-25	1904-01-01 07:10:00	3
189	10	29	F	2010-09-24	2010-09-24	N	N	2010-09-24	1904-01-01 07:30:00	2010-09-25	1904-01-01 14:00:00	2010-09-26	2010-09-24	1904-01-01 13:00:00	6	2010-09-24	1904-01-01 20:30:00	6	2010-09-25	1904-01-01 05:30:00	6	2010-09-25	1904-01-01 16:00:00	4	2010-09-25	1904-01-01 21:10:00	2
190	4	15	M	2010-09-24	2010-09-24	N	N	2010-09-24	1904-01-01 09:00:00	2010-09-25	1904-01-01 08:00:00	2010-09-26	2010-09-24	1904-01-01 13:30:00	4	2010-09-24	1904-01-01 18:15:00	4	2010-09-24	1904-01-01 23:10:00	4	2010-09-25	1904-01-01 05:30:00	4	2010-09-25	1904-01-01 14:30:00	3	2010-09-25	1904-01-01 19:40:00	2
201	4	17	M	2010-09-27	2010-09-27	N	N	2010-09-27	1904-01-01 08:30:00	2010-09-28	1904-01-01 14:00:00	2010-09-29	2010-09-27	1904-01-01 10:30:00	4	2010-09-27	1904-01-01 16:15:00	4	2010-09-27	1904-01-01 21:22:00	4	2010-09-28	1904-01-01 05:14:00	4	2010-09-28	1904-01-01 08:22:00	4	2010-09-28	1904-01-01 11:40:00	3	2010-09-28	1904-01-01 15:32:00	3	2010-09-28	1904-01-01 20:15:00	2
202	4	16	M	2010-09-27	2010-09-27	N	N	2010-09-27	1904-01-01 09:00:00	2010-09-28	1904-01-01 14:00:00	2010-09-29	2010-09-27	1904-01-01 09:58:00	6	2010-09-27	11:33	6	2010-09-27	1904-01-01 15:04:00	6	2010-09-27	1904-01-01 18:20:00	5	2010-09-27	1904-01-01 23:49:00	5	2010-09-28	1904-01-01 03:18:00	5	2010-09-28	1904-01-01 06:00:00	4	2010-09-28	1904-01-01 09:23:00	4	2010-09-28	1904-01-01 12:45:00	3	2010-09-28	1904-01-01 16:59:00	3
203	7	28	M	2010-09-27	2010-09-27	N	N	2010-09-27	1904-01-01 09:47:00	2010-09-28	1904-01-01 16:00:00	2010-09-29	2010-09-27	1904-01-01 10:51:00	5	2010-09-27	1904-01-01 12:53:00	5	2010-09-27	1904-01-01 16:20:00	5	2010-09-27	1904-01-01 20:50:00	4	2010-09-28	1904-01-01 10:49:00	3	2010-09-28	1904-01-01 20:30:00	2	2010-09-29	1904-01-01 07:35:00	2
204	3	12	F	2010-09-27	2010-09-27	N	N	2010-09-27	1904-01-01 13:25:00	2010-09-28	1904-01-01 07:00:00	2010-09-29	2010-09-27	1904-01-01 15:00:00	5	2010-09-27	1904-01-01 17:45:00	5	2010-09-27	1904-01-01 22:30:00	5	2010-09-28	1904-01-01 03:40:00	4	2010-09-28	1904-01-01 10:27:00	4	2010-09-28	1904-01-01 15:15:00	3	2010-09-28	1904-01-01 21:30:00	2	2010-09-29	1904-01-01 07:29:00	3
335	17	52	F	2010-11-27	2010-11-27	N	N	2010-11-27	1904-01-01 07:10:00	2010-11-28	1904-01-01 07:10:00	2010-11-29	2010-11-27	1904-01-01 12:49:00	5	2010-11-27	1904-01-01 18:27:00	5	2010-11-28	1904-01-01 01:40:00	5	2010-11-28	1904-01-01 05:18:00	5	2010-11-28	1904-01-01 13:23:00	3	2010-11-29	1904-01-01 21:17:00	3	2010-11-29	1904-01-01 06:00:00	3													3	2	6	3
338	17	65	F	2010-01-27	2010-11-27	N	N	2010-11-27	1904-01-01 09:00:00	2010-11-28	1904-01-01 09:00:00	2010-11-29	2010-11-27	1904-01-01 12:05:00	6	2010-11-27	1904-01-01 16:20:00	6	2010-11-27	1904-01-01 22:15:00	6	2010-11-28	1904-01-01 04:30:00	6	2010-11-28	1904-01-01 12:40:00	4	2010-11-28	1904-01-01 18:20:00	4	2010-11-29	1904-01-01 04:15:00														2	2	6	3
347	17	69	M	2010-11-28	2010-11-28	N	N	2010-11-28	1904-01-01 11:30:00	2010-11-29	1904-01-01 11:30:00	2010-11-30	2010-11-28	1904-01-01 14:05:00	6	2010-11-28	1904-01-01 19:12:00	6	2010-11-29	1904-01-01 01:40:00	6	2010-11-29	1904-01-01 07:29:00	6	2010-11-29	1904-01-01 20:17:00	3	2010-11-30	1904-01-01 09:47:00	2																2	2	6	2
369	17	43	M	2010-12-01	2010-12-01	N	N	2010-12-01	1904-01-01 14:00:00	2010-12-02	1904-01-01 14:00:00	2010-12-03	2010-12-01	1904-01-01 19:23:00	4	2010-12-02	1904-01-01 02:15:00	4	2010-12-02	1904-01-01 05:50:00	4	2010-12-02	1904-01-01 12:18:00	4	2010-12-03	1904-01-01 03:20:00	3	2010-12-03	1904-01-01 09:55:00	3																3	2	4	2
370	2	10	M	2010-12-01	2010-12-01	N	N	2010-12-01	1904-01-01 15:30:00	2010-12-02	1904-01-01 15:30:00	2010-12-03	2010-12-01	1904-01-01 17:20:00	5	2010-12-01	1904-01-01 20:50:00	5	2010-12-02	1904-01-01 04:12:00	4	2010-12-02	1904-01-01 09:58:00	4	2010-12-02	1904-01-01 12:00:00	3	2010-12-03	6:27	3	2010-12-03	1904-01-01 13:45:00	3													2	2	4	2
379	16	65	M	2010-12-02	2010-12-02	N	N	2010-12-02	1904-01-01 15:25:00	2010-12-03	1904-01-01 15:25:00	2010-12-04	2010-12-02	1904-01-01 18:30:00	6	2010-12-02	1904-01-01 22:50:00	6	2010-12-03	1904-01-01 03:08:00	6	2010-12-03	1904-01-01 09:17:00	6	2010-12-03	1904-01-01 13:19:00	5	2010-12-03	1904-01-01 20:17:00	5	2010-12-04	1904-01-01 05:12:00	4	2010-12-04	1904-01-01 11:36:00	4										3	2	3	2
406	2	10.3	F	2010-12-06	2010-12-06	N	N	2010-12-06	1904-01-01 13:20:00	2010-12-07	1904-01-01 13:20:00	2010-12-08	2010-12-06	1904-01-01 16:10:00	6	2010-12-06	1904-01-01 22:10:00	6	2010-12-07	1904-01-01 07:40:00	6	2010-12-07	1904-01-01 11:50:00	6	2010-12-07	1904-01-01 20:15:00	4	2010-12-08	1904-01-01 04:05:00	4	2010-12-08	1904-01-01 12:00:00	4													1	1	5	2
[truncated: 26 more columns]
